# Supplementary material for: Metabolomic Profiling of Bile Acids in an Experimental Model of Prodromal Parkinson’s Disease
Source: MDPI journal article supplement (doi:10.3390/metabo8040071), 2018-10-31
Supplement: s1 [file s1]

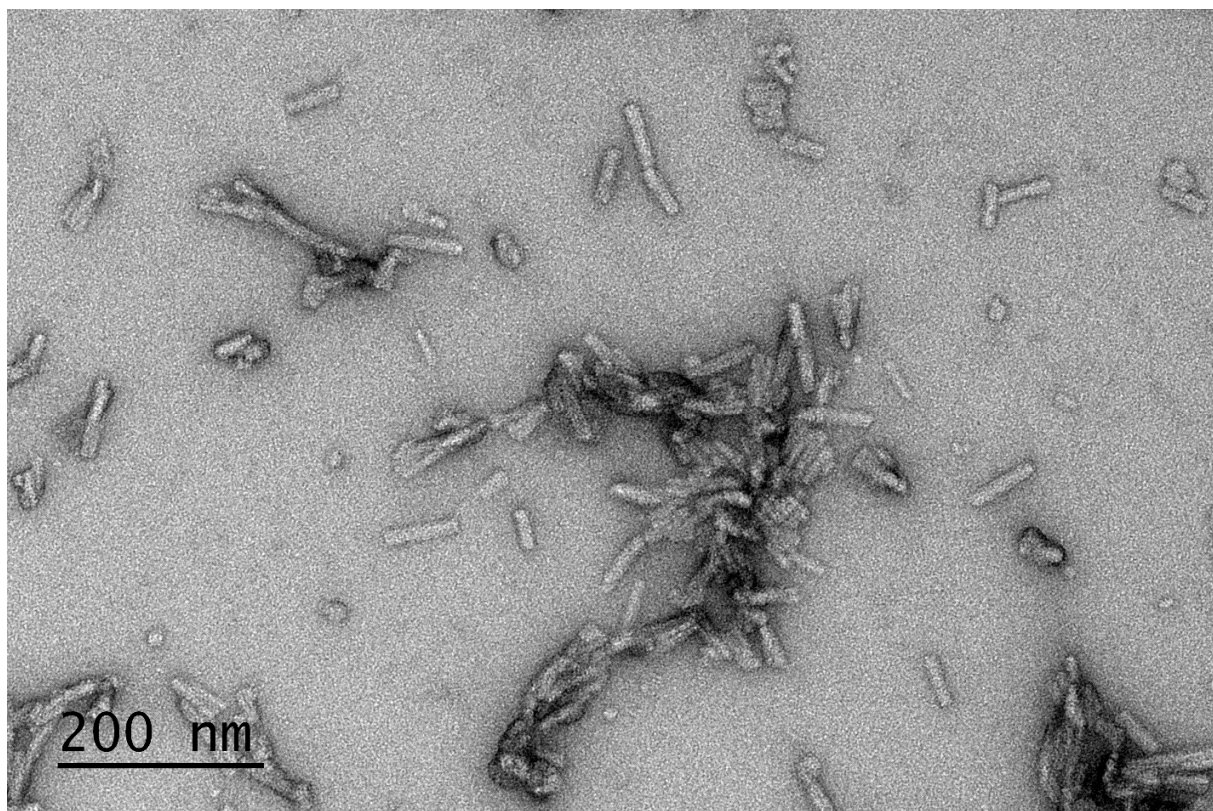

**Figure S1.** Sonicated PPFs stained by uranyl formate, imaged by transmission electron microscopy to confirm their fibrillary nature.
